# Supplementary material for: Nucleotide imbalance decouples cell growth from cell proliferation
Source: PubMed Central journal article supplement (PMC9359916; doi:10.1038/s41556-022-00965-1), 2022-08-04

Figure 4a

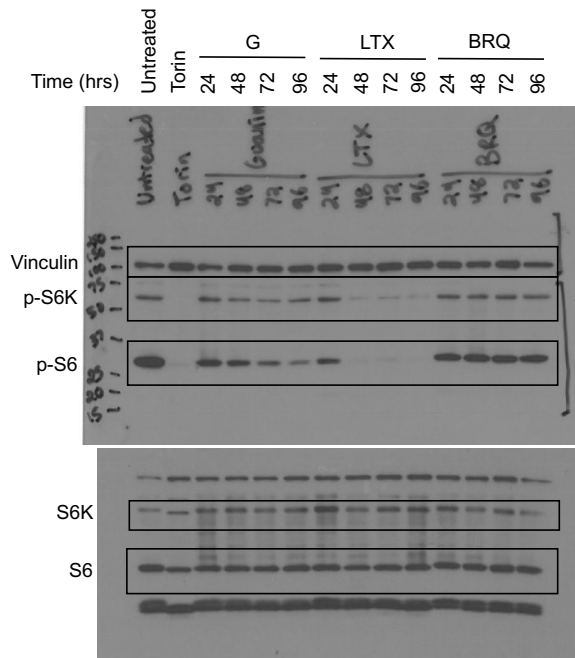

Figure 4d

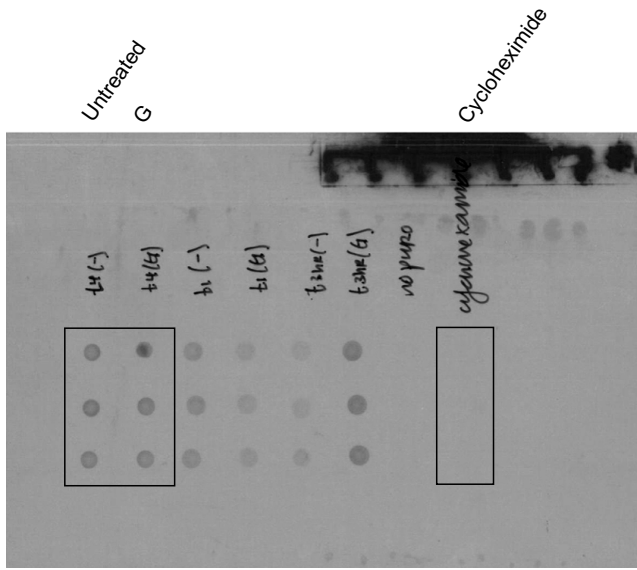

Supplement: 41556_2022_965_MOESM10_ESM.pdf [file 41556_2022_965_MOESM10_ESM.pdf]
