# Supplementary material for: Nucleotide imbalance decouples cell growth from cell proliferation
Source: PubMed Central journal article supplement (PMC9359916; doi:10.1038/s41556-022-00965-1), 2022-08-04

# Extended Data Figure 4a

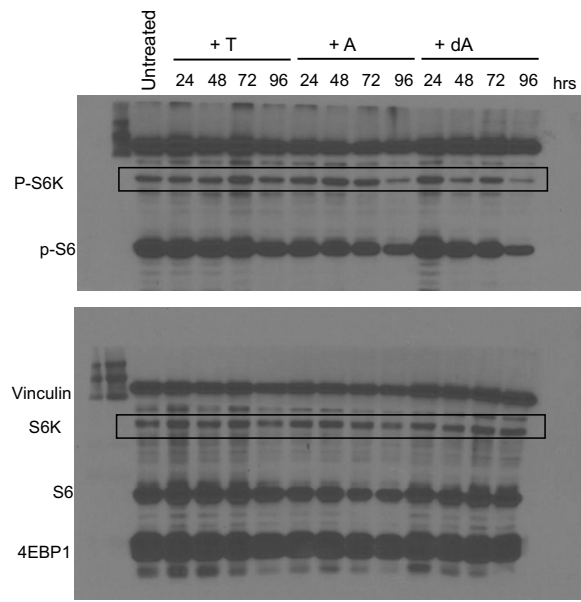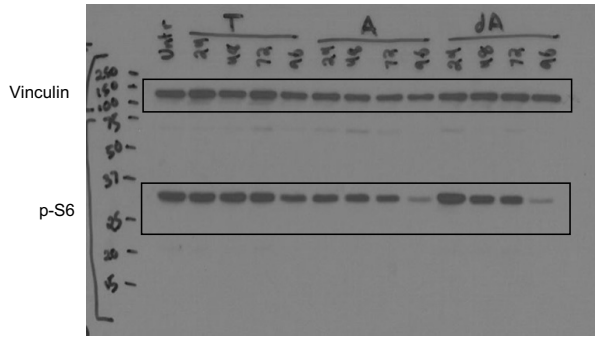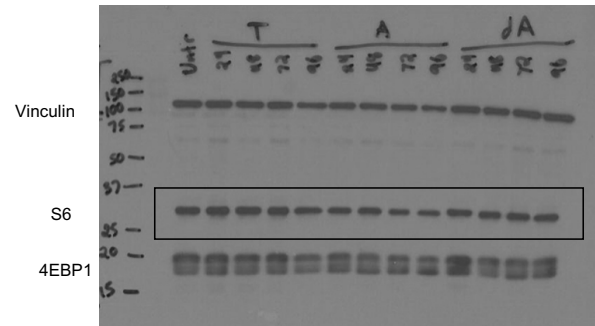

# Extended Data Figure 4b

## 143B

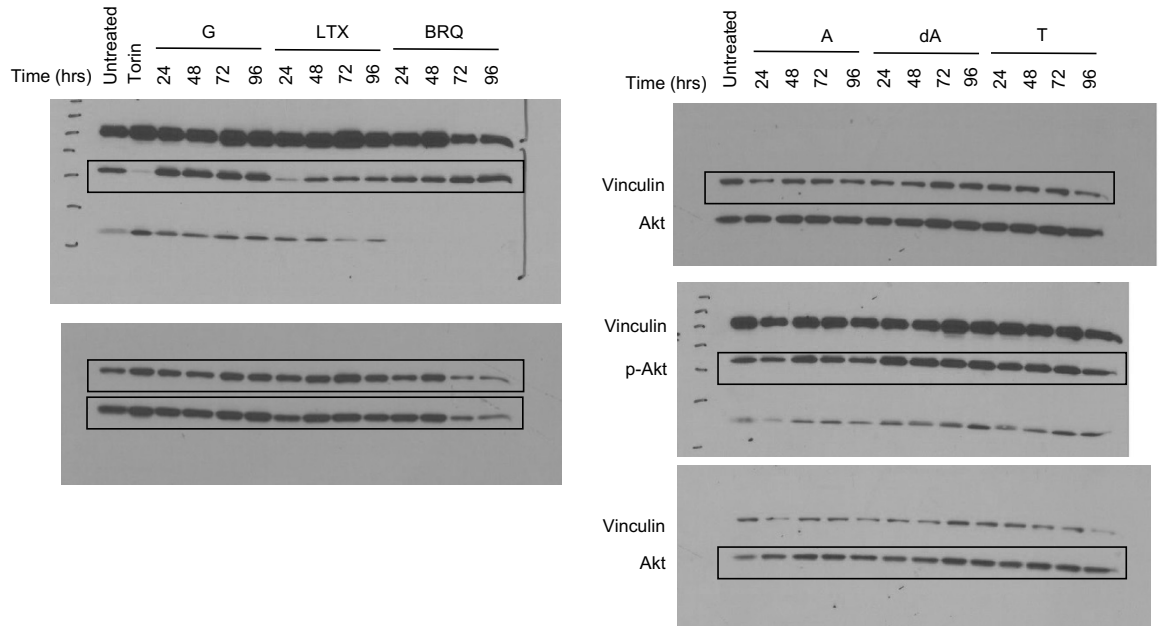

## H1299

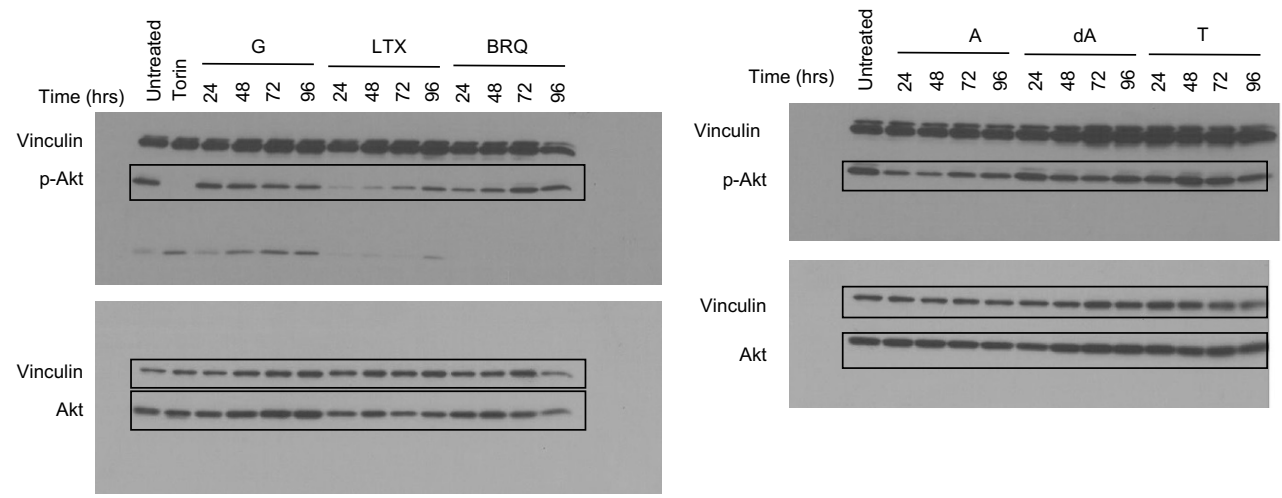

# Extended Data Figure 4c

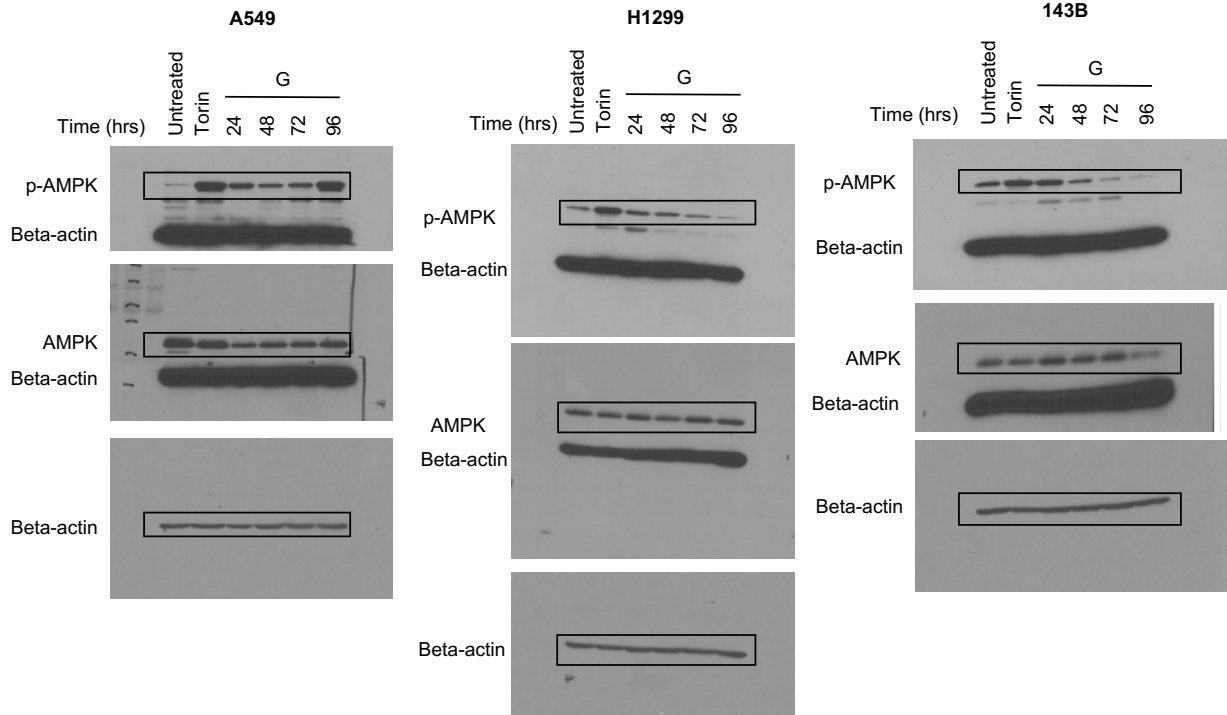

# Extended Data Figure 4d

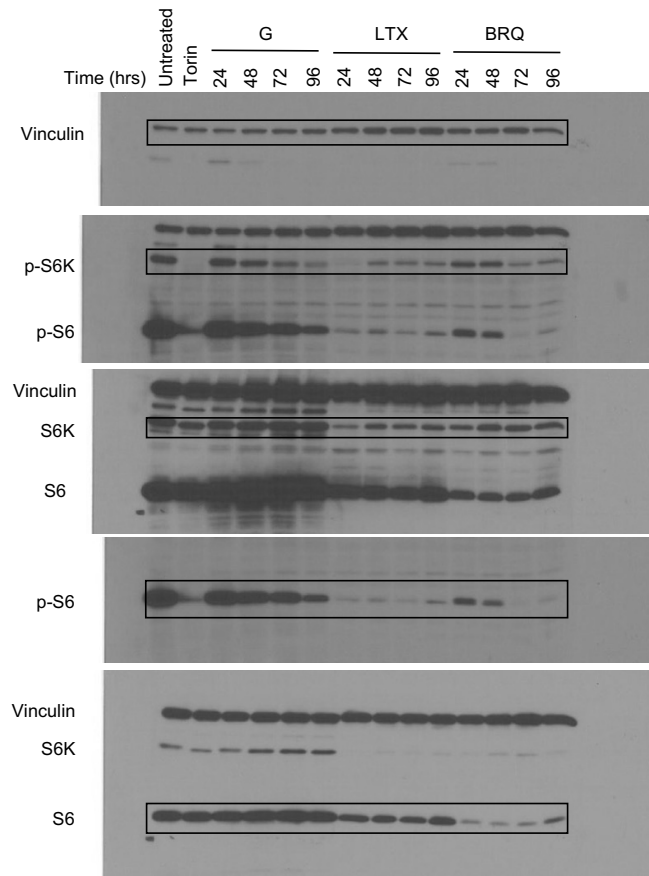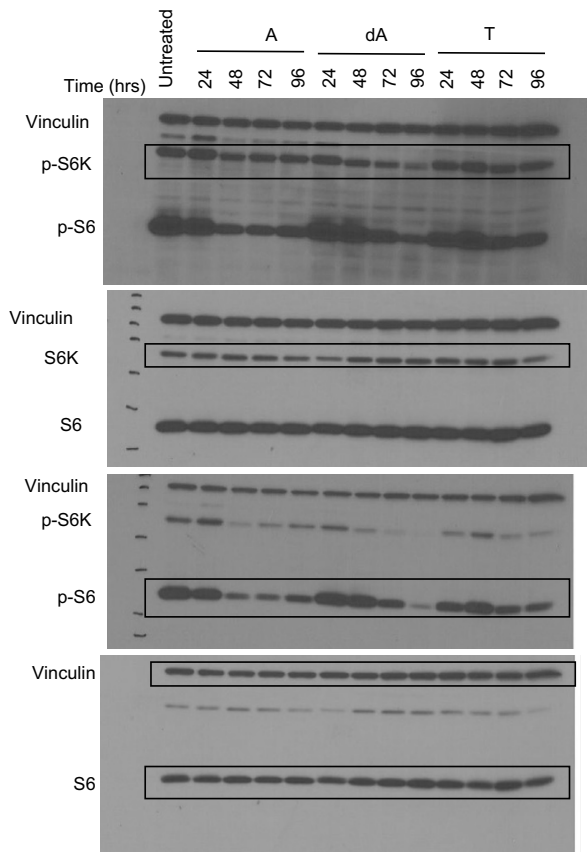

# Extended Data Figure 4I

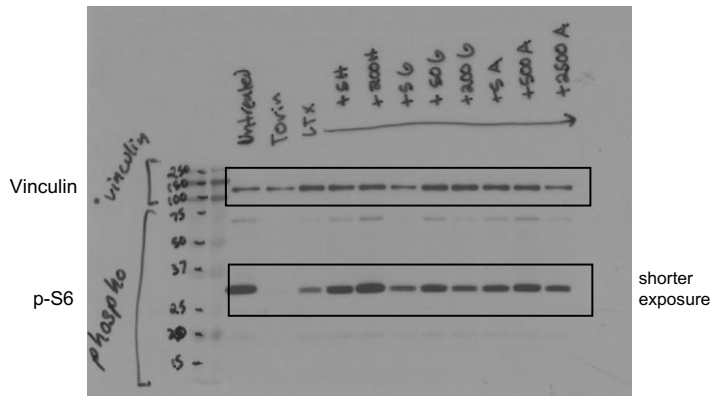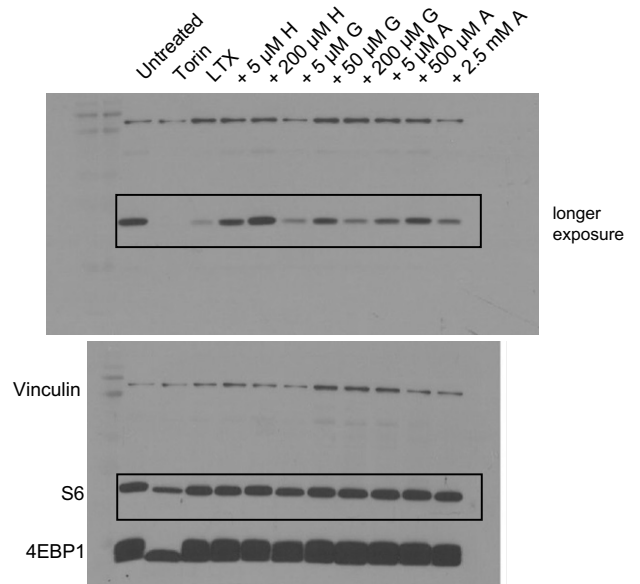

# Extended Data Figure 4m

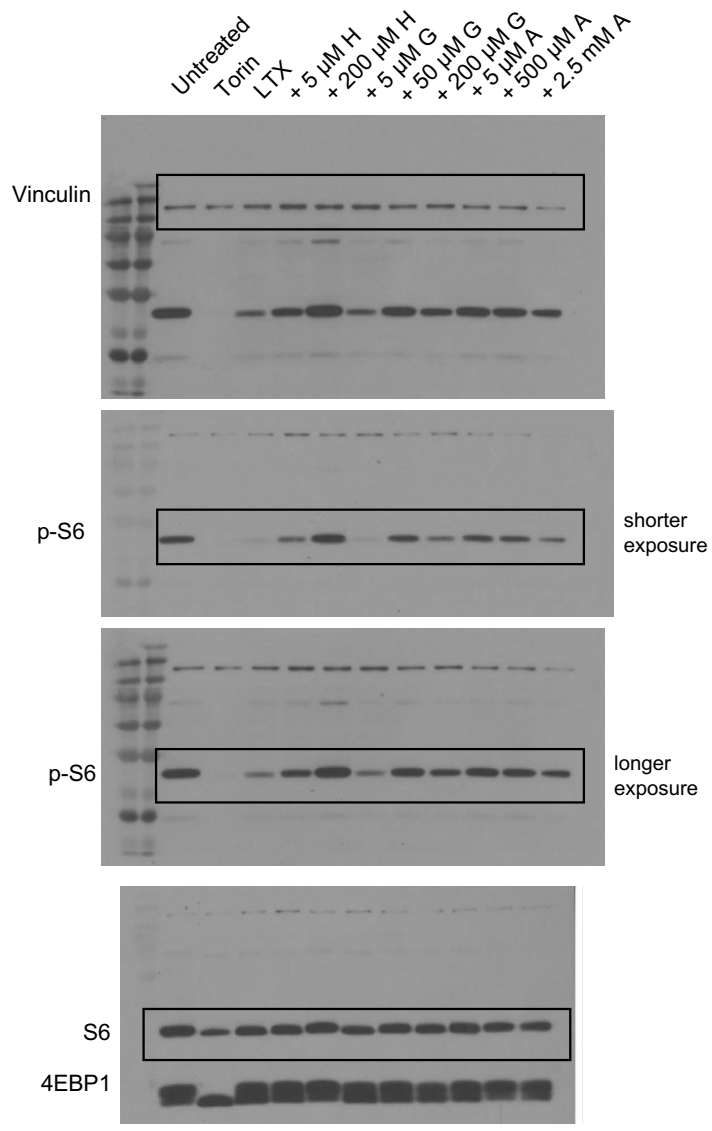

Supplement: 41556_2022_965_MOESM19_ESM.pdf [file 41556_2022_965_MOESM19_ESM.pdf]
